1

2

## Inflammatory and oxidative status in European captive black

3

## rhinoceroses: a link with Iron Overload Disorder?

4

5 Hanae Pouillevet<sup>1#a\*</sup>, Nicolas Soetart<sup>1,2</sup>, Delphine Boucher<sup>1,2</sup>, Rudy Wedlarski<sup>3</sup> and Laetitia

6 Jaillardon<sup>1,2</sup>

7

8 <sup>1</sup> Oniris Nantes-Atlantic National College of Veterinary Medicine, Nantes, France

9 <sup>2</sup> LDHVet-LabOniris, Nantes, France

10 <sup>3</sup> Bioparc de Doué-La-Fontaine, Doué-la-Fontaine, France

11 <sup>#a</sup> Current address: ZooParc de Beauval, Saint-Aignan, France

12

13

14 \* Corresponding author:

15 E-mail: hanae\_pouillevet@hotmail.fr

## 16 **Abstract**

17           Iron Overload Disorder (IOD) is a syndrome developed by captive browsing  
18 rhinoceroses like black rhinoceroses (*Diceros bicornis*) in which hemosiderosis settles in vital  
19 organs while free iron accumulates in the body, potentially predisposing to various secondary  
20 diseases. Captive grazing species like white rhinoceroses (*Ceratotherium simum*) do not seem  
21 to be affected. The pro-oxidant and pro-inflammatory properties of iron, associated with the  
22 poor antioxidant capacities of black rhinoceroses, could enhance high levels of inflammation  
23 and oxidative stress leading to rapid ageing and promoting diseases. In this prospective study,  
24 15 black (BR) and 29 white rhinoceroses (WR) originating from 22 European zoos were blood-  
25 sampled and compared for their iron status (serum iron), liver/muscle biochemical parameters  
26 (AST, GGT, cholesterol), inflammatory status (total proteins, protein electrophoresis) and  
27 oxidative stress markers (SOD, GPX, dROMs). Results showed higher serum iron and liver  
28 enzyme levels in black rhinoceroses ( $P<0.01$ ), as well as higher GPX ( $P<0.05$ ) and dROM  
29 ( $P<0.01$ ) levels. The albumin/globulin ratio was lower in black rhinoceroses ( $P<0.05$ ) due to  
30 higher  $\alpha_2$ -globulin levels ( $P<0.001$ ). The present study suggests a higher inflammatory and  
31 oxidative profile in captive BR than in WR, possibly in relation to iron status. This could be  
32 either a consequence or a cause of iron accumulation, potentially explaining rapid ageing and  
33 various diseases. Further investigations are needed to assess the prognostic value of the  
34 inflammatory and oxidative markers in captive black rhinoceroses, particularly for evaluating  
35 the impact of reduced-iron and antioxidant-supplemented diets.

## 36 Introduction

37 Black rhinoceroses (*Diceros bicornis*, BR) are browser rhinoceroses found in eastern  
38 and southern Africa. The three extant wild subspecies, *i.e.* south-western BR (*D. b. ssp.*  
39 *bicornis*), eastern BR (*D. b. ssp. michaeli*) and southern-central BR (*D. b. ssp. minor*), are  
40 considered vulnerable to critically endangered by the International Union for Conservation of  
41 Nature (IUCN) [1]. Recently, international collaboration enabled the translocation of five BR  
42 from three European zoos to Akagera National Park in Rwanda, to diversify the gene-pool and  
43 enable healthy population growth in the park [2].

44 Still, *ex situ* conservation of BR in zoological institutions remains challenging because  
45 captive individuals develop several diseases not described in wild BR [3], including hemolytic  
46 anemia, hepatopathy, ulcerative dermatopathy and Iron Overload Disorder (IOD). The latter is  
47 a syndrome that is being exponentially described in captive BR [4–7], but is not reported in  
48 wild BR [4,8–10] nor in grazer rhinoceroses such as white rhinoceroses (*Ceratotherium simum*,  
49 WR), whether they be captive or wild. This syndrome is a form of iron storage disease due to  
50 free iron accumulation within the organism, leading to hemosiderosis and subsequent  
51 hemochromatosis in vital organs, potentially enhancing organ failure in BR [10,11]. The longer  
52 the time spent in captivity, the more severe the disease [12]. Currently, the main hypothesis to  
53 explain captive BR's susceptibility to iron accumulation is a discrepancy between the captive  
54 and the natural diet, which may lead to increased availability of iron in the captive diet [6,11,13–  
55 15].

56 In humans, hemochromatosis is considered as an inflammatory disease [16] with  
57 increased oxidative stress [17]. Oxidative stress has severe consequences on health through  
58 high tissue and cellular toxicity [16–21] thus participating in cancer formation [18,22] and  
59 promoting secondary diseases and rapid ageing. Even finely regulated in the healthy state, non-  
60 transferrin bound iron (NTBI, also called free iron) is able to accept and donate electrons readily

61 thus enhancing the formation of free radicals and consequently oxidative stress [17,23]. Under  
62 pathological conditions, iron and superoxide metabolisms are strongly interactive and can  
63 exacerbate the toxicity of the other, leading to a self-sustained and ever-increasing spiral of  
64 cytotoxic and mutagenic events [17]. This interaction has already been suggested in a BR since  
65 they seem to experience a high susceptibility to oxidative stress compared to other mammals  
66 [24–29] due to their impaired antioxidant capacities that appeared to be compounded by iron  
67 overload.

68 In the present study, the authors hypothesized that inflammation and oxidative stress  
69 may be implicated in the pathogenesis of IOD in captive BR, making this syndrome a potential  
70 common denominator to various diseases described in captivity in this species. This study was  
71 thus designed to compare inflammation status and oxidative stress levels in relation to iron  
72 status in captive BR and WR, the latter being a species theoretically unaffected by IOD.

73

## 74 **Materials and methods**

### 75 **Study population**

76 Fifteen BR from 8 European zoos (nine females and six males, aged 5-33 yr-old) and  
77 29 WR from 14 European zoos (18 females and six males, five unknown, aged 4-46 yr-old)  
78 were prospectively included between May 2017 and May 2018. Within the 4/15 BR for which  
79 the medical background was available, one was reported with infertility, one with ulcerative  
80 dermatitis, and one with joint pain or arthritis, whereas the last one had not experienced any  
81 infection or illness to the veterinarian's knowledge. Regarding the 21/29 WR for which the  
82 medical background was available, 3/21 were reported with arthritis/joint pain, 1/21 with carpal  
83 tumour, 1/21 with allergic conjunctivitis and rhinitis, 4/21 with suspected infertility, and the  
84 13/21 remaining had not experienced any infection or illness to the veterinarians' knowledge.  
85 None of these captive BR and WR was reported to receive iron chelators.

86

## 87 **Sample collection, processing and analysis**

88         This prospective study was validated and supported upstream by coordinators of both  
89 BR and WR European Association of Zoos and Aquaria's European Endangered Species  
90 Programmes. Each rhinoceros was blood sampled opportunistically by zoo veterinarians,  
91 whether during an anaesthesia procedure or a medical training session that was planned to occur  
92 independently from the present study. Three millilitre blood samples were collected whether  
93 from the auricular or radial vein, both in a heparin and a dry tube. The dry tube was settled for  
94 two hours, then centrifuged (1.733 g for five minutes) and the serum was transferred into a  
95 clean dry tube. Within 7 days after sampling, both heparinized whole blood and serum tubes  
96 were sent to the veterinary laboratory (LDHVet-LabOniris, Nantes, France). Median delay  
97 between the sampling and the reception by the lab was 3 days [range from 1 to 7 days] including  
98 2 days of shipment [range from 1 to 3 days]. Directly after reception, whole blood and serum  
99 were aliquoted and stored at -20°C until analyses were performed.

100         All the serum biochemistry was performed using an automated biochemistry analyser  
101 (RX Daytona, Randox Laboratories, Crumlin, County Antrim, United Kingdom), unless  
102 indicated otherwise. Iron status was evaluated through serum iron measurement (ferrozine  
103 colorimetric method). As the liver and muscle are reported as the first tissues suffering from  
104 IOD in BR [30], the hepatic and muscular functions were investigated through the measurement  
105 of the following parameters: aspartate aminotransferase (AST, L-aspartate/ $\alpha$ -oxoglutarate as  
106 substrate), gamma glutamyltransferase (GGT, L- $\gamma$ -glutamyl-3-carboxy-4-  
107 nitroanilide/glycylglycine as substrate), cholesterol (cholesterol esterase/oxidase method) and  
108 creatine kinase (CK, creatine phosphate as substrate). Inflammation status was evaluated by  
109 measuring total serum protein (TP, biuret method) and agarose gel electrophoretic albumin and  
110 globulin fractions (albumin and globulins including  $\alpha_1$ -,  $\alpha_2$ -,  $\beta$ - and  $\gamma$ -globulin fractions,

111 agarose gel method (Hyrys2, Hydragel; Sebia, Evry, France). Globulin fractions were  
112 determined according to recent published data from Hooijberg and colleagues [31].  $\alpha_1$ -  
113 globulins refers to  $\alpha_1$ -a and  $\alpha_1$ -b fractions, and  $\beta$ -globulins refers to  $\beta_1$  and  $\beta_2$  fractions. The  
114 albumin:globulin ratio (A/G) was calculated. Finally, oxidative stress was assessed through the  
115 measurement of superoxide dismutase (SOD) and glutathione peroxidase (GPX) activities  
116 (colorimetric methods with RANSOD and RANSEL test kits respectively), and reactive oxygen  
117 metabolites (dROMs, Diacron Reactive Oxygen Metabolites d-ROMs test, Diacron  
118 Laboratories Grosseto, Italy).

119 No heparinized whole blood was received for one of the BR in which GPX and SOD  
120 could thus not be measured. A blood clot was observed in the heparin tube of one WR. As a  
121 consequence, GPX, SOD and dROMs could not be measured. CK levels were measured after  
122 all the other analyses: as such, this information is missing for two BR and three WR for which  
123 serum was lacking. Finally, in one of the WR, protein electrophoresis showed aberrant results  
124 which remained unexplained and it was thus excluded from the results.

125

## 126 **Statistical analyses**

127 All statistical analyses were carried out using R-Studio software version 1.1.442 [32].  
128 The data were pooled across species, and basic descriptive statistics, including arithmetic mean,  
129 median, standard deviation (SD), minimum and maximum, were obtained for each parameter.  
130 As no variable was normally distributed, non-parametric statistical tests were used. Mann  
131 Whitney test was performed for all the quantitative parameters (age, iron, AST and CK  
132 activities, cholesterol, total proteins, albumin, SOD and GPx) in order to compare BR and WR.  
133 Graphic assessment of the SOD and GPx data showed a potential discriminant threshold ( $>1500$   
134 g/Hb and  $>300$  U/gHb, respectively) between the 2 populations of rhinos. As a result, these  
135 data were transformed into categorical variables (“Normal” versus “High”) for the statistical

136 analysis. For GGT and dROMs values, as some results were out of the linearity range of the  
137 analyser (10 rhinos had GGT values <8 U/L and 13 had dROMs > 1,000 UCARR), a 2 level  
138 categorization was also performed using a graphically determined threshold (13 U/L for GGT  
139 and 800 UCARR for dROMs). Chi-squared tests were used to compare BR and WR for sex,  
140 CatGGT, CatdROMs, CatSOD and CatGPX. Statistical significance was set at  $P < 0.05$ .

141

## 142 **Results**

143 Measured parameters for both European captive BR and WR are listed in Table 1. Sex  
144 distribution did not differ significantly between BR and WR ( $P=0.32$ ) as well as age (median  
145 21 years [5-33] versus 16 years [4-46], respectively) ( $P = 0.32$ ). Serum iron was significantly  
146 higher ( $P < 0.01$ ) in BR (median 42.0 [26.6-58.9]  $\mu\text{mol/L}$ ) compared to WR (28.0 [11.1-58.4]  
147  $\mu\text{mol/L}$ ) (Fig 1). Regarding liver and muscular function, AST activity (96 [72-152] versus 71  
148 [12-178] U/L for BR and WR, respectively) (Fig 1), CatGGT (100% “High” *i.e* GGT>13 U/L  
149 versus 20.8% for BR and WR, respectively) and CK (323 [199-945] versus 196 [129-697] U/L  
150 for BR and WR, respectively) were significantly higher ( $P < 0.01$ ) in BR compared to WR. Total  
151 proteins were significantly higher ( $P = 0.03$ ) in BR (84 [65-92] g/L) compared to WR (78 [70-  
152 95] g/L) (Fig 1). A/G ratio was significantly lower ( $P = 0.01$ ) in BR (0.56 [0.31-0.83]) compared  
153 to WR (0.73 [0.20-1.07]) because of significantly higher ( $P < 0.001$ ) levels of  $\alpha_2$ -globulin (16.2  
154 [10.2-21.9] g/L and 11.2 [6.7-15.8] g/L for BR and WR, respectively) (Figs 1 and 2). Finally,  
155 regarding oxidative stress assessment, CatdROMs was significantly higher ( $P < 0.001$ ) in BR  
156 (93.3 % “High” *i.e* dROMs > 800 UCARR) in comparison to WR (32.1% “High” *i.e* dROMs  
157 > 800 UCARR), as well as CatGPX ( $P = 0.047$ ; 64.3% versus 32.1% of “High” *i.e*. GPX > 300  
158 U/gHb, for BR and WR, respectively).

159

160 **Fig 1. Boxplots showing the quartiles and outliers of serum iron, AST, TP and  $\alpha_2$ -**

161 **globulins results in 15 European captive black rhinoceroses (BR) and 29 white**  
162 **rhinoceroses (WR).** Values were significantly different between the species in all cases ( $P <$   
163  $0.05$ ).

164

165 **Fig 2. Serum protein electrophoreses showing an example of the serum protein**  
166 **distribution in a black rhinoceros (BR, total proteins 92 g/L,  $\alpha_2$  globulins 27 g/L) and a**  
167 **white rhinoceros (WR, total proteins 75 g/L,  $\alpha_2$  globulins 9.6 g/L).** Note the increased size  
168 of the  $\alpha_2$  globulin region in the BR compared to the WR (grey areas).



169 **Table 1. Results for parameters measured in European captive black and white rhinoceroses for the evaluation of iron status, hepatic**  
 170 **and muscular function, inflammation status and oxidative stress levels.<sup>a</sup>**

|                                         | Black rhinoceros |       |      |                   |         |                   |    | White rhinoceros |       |      |        |         |        |    |
|-----------------------------------------|------------------|-------|------|-------------------|---------|-------------------|----|------------------|-------|------|--------|---------|--------|----|
|                                         | Mean             | SD    | Min  | Median            | Max     | “High”            | n  | Mean             | SD    | Min  | Median | Max     | “High” | n  |
| 174 <b>Age (years)</b>                  | 19               | 9.2   | 5    | 21                | 33      |                   | 15 | 16               | 10.0  | 4    | 16     | 46      |        | 26 |
| 175 <b>Serum iron (μmol/L)</b>          | 42.2             | 10.7  | 26.6 | 42.0 <sup>b</sup> | 58.9    |                   | 15 | 29.8             | 9.9   | 11.1 | 28.0   | 58.4    |        | 29 |
| 176 <b>AST (U/L)</b>                    | 104              | 21.4  | 72   | 96 <sup>b</sup>   | 152     |                   | 15 | 77               | 33.4  | 12   | 71     | 178     |        | 29 |
| 177 <b>CK (U/L)</b>                     | 37<br>9          | 201.7 | 199  | 323 <sup>b</sup>  | 945     |                   | 13 | 246              | 142.9 | 129  | 196    | 697     |        | 26 |
| 178 <b>GGT (U/L)</b>                    | 25               | 8.1   | 14   | 24                | 45      |                   | 15 | c                | c     | < 8  | 10     | 20      |        | 29 |
| 180 <b>CatGGT (%)</b>                   |                  |       |      |                   |         | 100 <sup>b</sup>  | 15 |                  |       |      |        |         | 20.8   | 29 |
| 181 <b>Cholesterol (g/L)</b>            | 0.7              | 0.2   | 0.5  | 0.7               | 1.3     |                   | 15 | 0.8              | 0.4   | 0.4  | 0.7    | 2.6     |        | 29 |
| 182 <b>TP (g/L)</b>                     | 82.0             | 8.3   | 65.0 | 84.0 <sup>b</sup> | 92.0    |                   | 15 | 78.2             | 5.7   | 70.0 | 78.0   | 95.0    |        | 29 |
| 183 <b>A/G ratio</b>                    | 0.57             | 0.16  | 0.31 | 0.56 <sup>b</sup> | 0.83    |                   | 15 | 0.71             | 0.17  | 0.20 | 0.73   | 1.07    |        | 28 |
| 184 <b>Albumin (g/L)</b>                | 29.4             | 6.6   | 15.3 | 31.5              | 38.0    |                   | 15 | 32.1             | 5.9   | 13.3 | 32.4   | 40.4    |        | 28 |
| 185 <b>α<sub>1</sub>-globulin (g/L)</b> | 6.2              | 1.2   | 4.0  | 6.3               | 7.8     |                   | 15 | 6.1              | 0.8   | 4.6  | 6.1    | 7.6     |        | 28 |
| 186 <b>α<sub>2</sub>-globulin (g/L)</b> | 15.8             | 3.0   | 10.2 | 16.2 <sup>b</sup> | 21.9    |                   | 15 | 11.3             | 1.9   | 6.7  | 11.2   | 15.8    |        | 28 |
| 187 <b>β-globulin (g/L)</b>             | 16.4             | 3.4   | 11.9 | 17.1              | 21.8    |                   | 15 | 16.5             | 2.8   | 13.4 | 15.9   | 26.1    |        | 28 |
| 188 <b>γ-globulin (g/L)</b>             | 14.0             | 4.2   | 8.1  | 12.9              | 23.7    |                   | 15 | 12.4             | 2.9   | 7.7  | 12.4   | 22.5    |        | 28 |
| 189 <b>SOD (U/g Hb)</b>                 | 1737             | 340.3 | 1130 | 1730              | 2400    |                   | 14 | 1636             | 481.3 | 900  | 1505   | 3300    |        | 28 |
| 190 <b>CatSOD (%)</b>                   |                  |       |      |                   |         | 50                |    |                  |       |      |        |         | 71.4   |    |
| 191 <b>GPX (U/g Hb)</b>                 | 324              | 134.2 | 104  | 346               | 560     |                   | 14 | 240              | 113.8 | 47   | 239    | 423     |        | 28 |
| 192 <b>CatGPX (%)</b>                   |                  |       |      |                   |         | 64.3 <sup>b</sup> |    |                  |       |      |        |         | 32.1   |    |
| 193 <b>dROMs (U CARR)</b>               | c                | c     | 416  | 978               | > 1,000 |                   | 15 | c                | c     | 380  | 686    | > 1,000 |        | 28 |
| 194 <b>CatdROMs (%)</b>                 |                  |       |      |                   |         | 93.3 <sup>b</sup> | 15 |                  |       |      |        |         | 32.1   | 28 |

195 <sup>a</sup> A/G ratio indicates albumin/globulin ratio; CatGGT, GGT values categorized as “Normal” or “High” (> 13 U/L); CatSOD, SOD values  
 196 categorized as “Normal” or “High” (> 1,500 U/gHb); CatGPX, GPX values categorized as “Normal” or “High” (> 300 U/g/Hb); CatdROMs,  
 197 dROMs categorized as “Normal” or “High” (> 800 UCARR).

198 <sup>b</sup> Statistically significant (P < 0.05) differences between black rhinoceroses and white rhinoceroses.

199 <sup>c</sup> Not calculated because of values out of measurable assay range.

## 200 Discussion

201 This study showed that European captive black rhinoceroses exhibited higher serum  
202 iron concentration and higher inflammatory and oxidative status than captive white  
203 rhinoceroses. Taken together, these findings suggest that BR could be predisposed to iron  
204 accumulation probably leading to IOD and enhancing inflammatory and oxidative states.

205 Serum iron values found for the European captive BR included in the present study were  
206 very similar to those available in the literature regarding European [10] and American [14,33]  
207 captive BR. Serum iron levels being higher in captive BR compared to captive WR has already  
208 been reported [8,33]. As such, these results could confirm a predisposition of captive European  
209 BR to develop IOD, as previously described [34]. Even if liver biopsy remains the gold standard  
210 for definitive diagnosis of iron overload syndromes [35] and has already been performed in a  
211 live captive BR confirming diffuse hemosiderosis [36], this procedure is technically  
212 challenging due to the animal's size, the depth of the liver, the difficulty of ultrasound and the  
213 skin thickness. Despite having been used in several studies [8,37], ferritin is not specific for  
214 iron overload syndromes [38] and is reported as a poor biomarker for IOD progression in  
215 Sumatran rhinoceroses, another species of browser rhinoceros [39]. As a consequence, serum  
216 iron, TIBC (Total Iron Binding Capacity) measurement and subsequent calculation of  
217 Transferrin Saturation may be currently the best tools for guiding *ante-mortem* diagnosis and  
218 prognosis of IOD in captive BR as suggested by several studies [10,33,34,36] and should be  
219 included in regular blood tests when checking for the health status of captive BR. Measurement  
220 of the Total Iron Binding Capacity (TIBC) was intended in the present study through a direct  
221 method (TIBC\_2, colorimetric method, RX Daytona, Randox Laboratories, Crumlin, County  
222 Antrim, United Kingdom), but results were aberrant with many values of TIBC greater than the  
223 serum iron concentration, leading to a calculated Transferrin Saturation greater than 100%,  
224 which is physiologically not possible. Briefly, in this method, iron is first removed from

225 transferrin through acidification of the sample and a known amount of iron is added. All iron is  
226 then complexed and coloured with an iron-binding dye, and absorbance is measured. A second  
227 reagent is then added, making the pH rise, resulting in a large increased affinity of transferrin  
228 for iron. The observed decrease in absorbance of the coloured dye-iron complex is directly  
229 proportional to the TIBC of the serum [40]. We hypothesized that transferrin from rhinoceroses  
230 was not as pH-sensitive as human transferrin, and that pH variations were not adequate to  
231 accurately measure TIBC in this species, leading to underestimated values. Other methods, such  
232 as evaluation of unbound iron binding capacity (UIBC) might be more suitable to calculate  
233 Transferrin Saturation in rhinoceroses, as reported in humans [41,42].

234         Liver function was assessed through AST and GGT measurements, as recommended for  
235 domestic horses [43], especially when investigating hemochromatosis [44,45]: indeed, the  
236 horse is considered as a very good domestic model animal for rhinoceroses [46,47]. In the  
237 present study, increased values of AST in BR compared to WR could have two main causes,  
238 including compromised liver function as suggested by increased GGT, and muscular lesions as  
239 suggested by increased CK. Molenaar and colleagues reported similar results for GGT in  
240 European captive BR [10]. IOD could be implicated in both hepatic and muscular dysfunctions.  
241 Indeed, the liver is the first site of hemochromatosis when IOD develops in BR, which impairs  
242 its function [16,30]. Iron deposition in muscles has been reported in BR affected by IOD [30].  
243 As hemochromatosis, the latest stage of hemosiderosis, is a progressive and irreversible process  
244 with fibrosis that eventually leads to hepatic cirrhosis or carcinoma and fatality in humans [48–  
245 50], hepatic biochemistry parameter measurements could be useful prognostic factors in BR  
246 affected by IOD.

247         Higher TP and decreased A/G ratio due to an increase of the  $\alpha_2$ -globulin fraction were  
248 observed in captive BR compared to WR, highly suggestive of an increased inflammatory state  
249 [51], as it is described in humans affected by hemochromatosis [16,52]. In this study, selecting

250 captive WR instead of free-ranging BR as the negative control precisely aimed at limiting the  
251 captivity bias since captivity may be pro-inflammatory by itself [37,53]. Serum protein  
252 electrophoretic results of the captive WR included in this study showed some variations in  
253 comparison to healthy free-ranging WR [31], further underlining the interest of selecting  
254 captive WR as a control group in order to limit the captivity bias. Obesity is described for being  
255 pro-oxidative and pro-inflammatory [54], but no study to date investigates the consequences of  
256 overweight in rhinoceroses. It would have been relevant to determine whether the European  
257 captive BR population did not exhibit significant obesity compared to the European captive  
258 WR at the time of the study. However, even if a body condition scoring system has been  
259 proposed for BR and Indian rhinoceroses [55,56], no such system exists for WR. The main  
260 proteins migrating in the  $\alpha_2$  region on serum protein electrophoresis include haptoglobin,  $\alpha_2$ -  
261 macroglobulin, ceruloplasmin and serum amyloid A (SAA). Since Smith and colleagues have  
262 already reported that haptoglobin levels were not significantly different between 10 BR and 20  
263 WR kept in captivity [8], it may not play an important role in the BR's  $\alpha_2$ -globulin increase in  
264 the present study.  $\alpha_2$ -macroglobulin inhibits numerous endogenous proteases and acts as a  
265 transport protein for cytokines and growth factors [57]. Increased  $\alpha_2$ -macroglobulin is favored  
266 by inflammatory states, such as diabetes mellitus in humans [57]. Ceruloplasmin levels increase  
267 with inflammation in humans [58]. Among many roles, this ferroxidase helps to reduce  
268 circulating free ferrous iron [17]. As a consequence, it could be hypothesized that ceruloplasmin  
269 levels may increase in BR with iron accumulation in response to inflammation and high levels  
270 of circulating free iron. As such, its measurement could be of interest in future studies on IOD  
271 in BR. Finally, SAA, that increases during inflammation, was reported to be significantly higher  
272 in captive BR compared to wild BR [53]. As a result, an increase in  $\alpha_2$ -macroglobulin,  
273 ceruloplasmin and SAA, which all suggest inflammation, could explain the increase in  $\alpha_2$ -  
274 globulin observed in the captive BR in this study. This finding suggests that IOD could be a

275 chronic inflammatory disease like hemochromatosis is in humans [16]. Inflammation is known  
276 for inducing tissue iron storage through hepcidin stimulation and as a consequence for  
277 progressively leading to hemochromatosis, thus aggravating iron overload syndromes [59].  
278 Inflammation could thus be a cause and a consequence of IOD in BR, making IOD a potential  
279 self-sustaining disease if no iron overload or inflammatory state management is undertaken,  
280 with regular phlebotomies as previously described [60].

281 dROMs are hydroperoxydes, meaning reactive oxygen metabolites that allow to directly  
282 evaluate oxidative stress levels [61,62]. SOD and GPX are antioxidant enzymes whose activity  
283 measurement indirectly allows to quantifying the response to oxidative stress [63,64]. In the  
284 present study, significantly higher levels of GPX and dROMs were observed in captive BR  
285 compared to WR, suggesting a higher degree of oxidative stress in captive BR. Increase in  
286 oxidative stress levels in captive BR could be due to their lower antioxidant capacities  
287 [25,28,29], captivity itself [37,53] and/or a self-sustaining process in which oxidative stress  
288 disrupts antioxidant defences [63]. High levels of oxidative stress can predispose to diseases  
289 and rapid ageing [17] and should be taken into consideration for husbandry, health care and  
290 more globally *ex-situ* conservation of endangered species like the BR. Oxidative stress is  
291 reported to worsen iron overload syndromes like iron overload cardiomyopathies in humans  
292 [65], which themselves favour reactive oxygen metabolite formation and thus oxidative stress  
293 increase [17]. IOD could then be self-sustained through the oxidative stress induced, leading to  
294 a vicious circle. However, no significant difference was found concerning SOD. One  
295 explanation may be that SOD is not as implicated in BR's antioxidant defences as in other  
296 mammals, making this biomarker possibly not adapted to this species. Regardless, due to low  
297 animal numbers, these results should be interpreted with caution.

298 The main limit of the present study is the postulate that all captive BR may be affected by IOD  
299 whereas captive WR are not, without performing a liver biopsy for a definitive diagnosis of

300 IOD. As such, the hypothesized link between increased inflammation and oxidative stress levels  
301 and the development of IOD in captive BR need further evaluations to be confirmed. Pre-  
302 analytical homogeneity is sub-optimal in the present study. Indeed, food, husbandry and  
303 medical management including treatments administered to captive BR and WR could not be  
304 controlled. Even if none of their diet included iron chelators, the amount of iron in each diet  
305 was not assessed. Also, each zoo institution that collected the blood samples performed the first  
306 steps of the processing *i.e.* centrifugation and serum transfer to a new dry tube. The detailed  
307 collection and processing protocol submitted to the institutions aimed at limiting this bias. After  
308 reception, all samples were aliquoted, frozen and stored at the laboratory for varying durations  
309 before they were analysed: this was done in order to group the tests. In humans, most common  
310 biochemical analytes show adequate stability in serum following 30 days of storage at  $-20^{\circ}\text{C}$   
311 [66], which was the temperature used in the present study for aliquot storage. Nevertheless, it  
312 cannot be ruled out that those pre-analytical variations may have compromised the reliability  
313 of some blood test results, as no study is available on the stability of such parameters in  
314 rhinoceros blood samples.

315

## 316 **Conclusions**

317 Findings of the present study suggest that captive Black Rhinoceroses exhibit higher  
318 iron concentrations, higher inflammatory status and higher oxidative stress levels than captive  
319 White Rhinoceroses. Taken together, these findings suggest that BR could be predisposed to  
320 iron accumulation probably leading to IOD and enhancing inflammatory and oxidative states.  
321 Both oxidative stress and inflammation may favour secondary diseases, rapid ageing, and  
322 aggravation of IOD, tissue hemochromatosis and organ fibrosis. Thus, efforts to control IOD  
323 progression in this endangered species when kept in captivity should be continued, whether  
324 through iron level control in the diet or through regular therapeutic phlebotomies. Further

325 investigations are needed to assess the prognostic value of the inflammatory and oxidative  
326 markers in captive BR, particularly for evaluating the impact of reduced-iron and antioxidant-  
327 supplemented diets.

328

## 329 **Acknowledgments**

330 The authors would like to thank the 22 European zoos that have participated in this  
331 prospective study by sending blood samples of their hosted black and white rhinoceroses, and  
332 LDHVet - LabOniris for performing the blood analyses.

333

## 334 **References**

- 335 1. Emslie R. *Diceros bicornis*. In: The IUCN Red List of Threatened Species 2012:  
336 e.T6557A16980917 [Internet]. 2012 [cited 21 Aug 2019]. Available:  
337 <http://dx.doi.org/10.2305/IUCN.UK.2012.RLTS.T6557A16980917.en>
- 338 2. Pereira E. Five rhinos from European zoos are heading to Rwanda. In: Save The Rhino  
339 [Internet]. 21 Jun 2019 [cited 21 Aug 2019]. Available:  
340 [https://www.savetherhino.org/rhino-species/black-rhino/five-black-rhinos-born-in-](https://www.savetherhino.org/rhino-species/black-rhino/five-black-rhinos-born-in-european-zoos-are-heading-to-africa/)  
341 [european-zoos-are-heading-to-africa/](https://www.savetherhino.org/rhino-species/black-rhino/five-black-rhinos-born-in-european-zoos-are-heading-to-africa/)
- 342 3. Dennis PM, Funk JA, Rajala-Schultz PJ, Blumer ES, Miller RE, Wittum TE, et al. A  
343 review of some of the health issues of captive black rhinoceroses (*Diceros bicornis*). *J*  
344 *Zoo Wildl Med.* 2007;38: 509–517. doi:10.1638/MS05-012.1
- 345 4. Ganz T, Goff J, Klasing K, Nemeth E, Roth T. IOD in rhinos - Immunity group report:  
346 report from the immunity, genetics and toxicology working group of the International  
347 Workshop on Iron Overload Disorder in Browsing Rhinoceros. *J Zoo Wildl Med.*  
348 2012;43: S117–S119.
- 349 5. Citino S, Bryant B, Duncan M, Fleming G, Hofmeyr M, Miller E, et al. IOD in rhinos -  
350 Veterinary group report: report from the clinical medicine and pathology working group  
351 of the international workshop on Iron Overload Disorder in browsing rhinoceros. *J Zoo*  
352 *Wildl Med.* 2012;43: S105–S107.
- 353 6. Clauss M, Dierenfeld E, Goff J, Klasing K, Koutsos L, Lavin S, et al. IOD in rhinos -  
354 Nutrition group report: report from the nutrition working group of the International  
355 Workshop on Iron Overload Disorder in Browsing Rhinoceros. *J Zoo Wildl Med.*  
356 2012;43: S108–S113.
- 357 7. Dennis P, Ellis S, Mellen J, Lee P, Olea-Popelka F, Petric A, et al. IOD in rhinos -  
358 Epidemiology group report: report from the epidemiology working group of the

- 359 International Workshop on Iron Overload Disorder in Browsing Rhinoceros. *J Zoo Wildl*  
360 *Med.* 2012;43: S114–S116. doi:10.1638/1042-7260-43.3s.S114
- 361 8. Smith JE, Chavey PS, Miller RE. Iron metabolism in captive black (*Diceros bicornis*) and  
362 white (*Ceratotherium simum*) rhinoceroses. *J Zoo Wildl Med.* 1995; 525–531.
- 363 9. Paglia DE, Tsu I-H. Review of laboratory and necropsy evidence for iron storage disease  
364 acquired by browser rhinoceroses. *J Zoo Wildl Med.* 2012;43: S92–S104.  
365 doi:10.1638/2011-0177.1
- 366 10. Molenaar FM, Sainsbury AW, Waters M, Amin R. High serum concentrations of iron,  
367 transferrin saturation and gamma glutamyl transferase in captive black rhinoceroses  
368 (*Diceros bicornis*). *Vet Rec.* 2008;162: 716–721. doi:10.1136/vr.162.22.716
- 369 11. Paglia DE. Iron storage syndrome in rhinoceroses: potential role for rhino keepers in  
370 prevention and therapy. Fourth Rhino Keepers Workshop. Columbus, Ohio; 2005. pp. 1–  
371 10.
- 372 12. Kock N, Foggin C, Kock MD, Kock R. Hemosiderosis in the black rhinoceros (*Diceros*  
373 *bicornis*): a comparison of free-ranging and recently captured with translocated and  
374 captive animals. *J Zoo Wildl Med.* 1992; 230–234.
- 375 13. Wright JB. Essential fatty acids, total lipid, and condensed tannin in the diet of captive  
376 black rhinoceroses (*Diceros bicornis*) in North America and in browses native to  
377 Zimbabwe, Africa. Cornell University, Thesis presented to the Faculty of the Graduate  
378 School. 1998.
- 379 14. Paglia DE, Dennis P. Role of chronic iron overload in multiple disorders of captive black  
380 rhinoceroses (*Diceros bicornis*). *Proc AAZV.* 1999. pp. 163–171.
- 381 15. Castell JC. Investigations on feeding and digestive physiology of the black rhinoceros  
382 (*Diceros bicornis*). University of Munich. 2005.
- 383 16. Ramm GA, Ruddell RG. Iron homeostasis, hepatocellular injury, and fibrogenesis in  
384 hemochromatosis: the role of inflammation in a noninflammatory liver disease. *Semin*  
385 *Liver Dis.* 2010;30: 271–287. doi:10.1055/s-0030-1255356
- 386 17. Emerit J, Beaumont C, Trivin F. Iron metabolism, free radicals, and oxidative injury.  
387 *Biomed Pharmacother.* 2001;55: 333–339. doi:10.1016/S0753-3322(01)00068-3
- 388 18. Zhuang T, Han H, Yang Z. Iron, oxidative stress and gestational diabetes. *Nutrients.*  
389 2014;6: 3968–3980. doi:10.3390/nu6093968
- 390 19. Ruivard M. Les chélateurs du fer : quand et comment les utiliser chez l’adulte ? *Rev*  
391 *Médecine Interne.* 2013;34: 32–38. doi:10.1016/j.revmed.2012.05.005
- 392 20. McCord JM. Effects of positive iron status at a cellular level. *Nutr Rev.* 1996;54: 85–88.
- 393 21. Bhat AH, Dar KB, Anees S, Zargar MA, Masood A, Sofi MA, et al. Oxidative stress,  
394 mitochondrial dysfunction and neurodegenerative diseases; a mechanistic insight. *Biomed*  
395 *Pharmacother Biomedecine Pharmacother.* 2015;74: 101–110.  
396 doi:10.1016/j.biopha.2015.07.025



- 397 22. Gozzelino R, Arosio P. Iron Homeostasis in Health and Disease. *Int J Mol Sci.* 2016;17:  
398 130. doi:10.3390/ijms17010130
- 399 23. Muñoz M, García-Erce JA, Remacha AF. Disorders of iron metabolism. Part 1: molecular  
400 basis of iron homeostasis. *J Clin Pathol.* 2011;64: 281–286.  
401 doi:10.1136/jcp.2010.079046
- 402 24. Chaplin H, Malecek AC, Miller RE, Bell CE, Gray LS, Hunter VL. Acute intravascular  
403 hemolytic anemia in the black rhinoceros: hematologic and immunohematologic  
404 observations. *Am J Vet Res.* 1986;47: 1313–1320.
- 405 25. Paglia DE, Miller RE. Erythrocytes of the Black rhinoceros *Diceros bicornis*:  
406 susceptibility to oxidant-induced haemolysis. *Int Zoo Yearb.* 1993;32: 20–27.  
407 doi:10.1111/j.1748-1090.1993.tb03510.x
- 408 26. Paglia DE. Acute episodic hemolysis in the African black rhinoceros as an analogue of  
409 human glucose-6-phosphate dehydrogenase deficiency. *Am J Hematol.* 1993;42: 36–45.
- 410 27. Paglia DE, Miller RE, Renner SW. Is impairment of oxidant neutralization the common  
411 denominator among diverse diseases of black rhinoceroses? *Proc AAZV.* 1996.
- 412 28. Paglia DE, Radcliffe RW. Anthracycline cardiotoxicity in a black rhinoceros (*Diceros*  
413 *bicornis*): evidence for impaired antioxidant capacity compounded by Iron Overload. *Vet*  
414 *Pathol Online.* 2000;37: 86–88. doi:10.1354/vp.37-1-86
- 415 29. Harley EH, Matshikiza M, Robson P, Weber B. Red blood cell metabolism shows major  
416 anomalies in Rhinocerotidae and Equidae, suggesting a novel role in general antioxidant  
417 metabolism. *Int Congr Ser.* 2004;1275: 334–340. doi:10.1016/j.ics.2004.08.062
- 418 30. Olias P, Mundhenk L, Bothe M, Ochs A, Gruber AD, Klopffleisch R. Iron Overload  
419 Syndrome in the Black Rhinoceros (*Diceros bicornis*): Microscopical Lesions and  
420 Comparison with Other Rhinoceros Species. *J Comp Pathol.* 2012;147: 542–549.  
421 doi:10.1016/j.jcpa.2012.07.005
- 422 31. Hooijberg EH, Miller M, Cray C, Buss P, Steenkamp G, Goddard A. Serum protein  
423 electrophoresis in healthy and injured southern white rhinoceros (*Ceratotherium simum*  
424 *simum*). *PLOS ONE.* 2018;13: e0200347. doi:10.1371/journal.pone.0200347
- 425 32. R Core Team. R: A language and environment for statistical computing. R Foundation for  
426 Statistical Computing; 2017. Available: <https://www.R-project.org/>
- 427 33. Dierenfeld ES, Atkinson S, Craig AM, Walker KC, Streich WJ, Clauss M. Mineral  
428 concentrations in serum/plasma and liver tissue of captive and free-ranging Rhinoceros  
429 species. *Zoo Biol.* 2005;24: 51–72. doi:10.1002/zoo.20043
- 430 34. Clauss M, Paglia DE. Iron storage disorders in captive wild mammals: the comparative  
431 evidence. *J Zoo Wildl Med.* 2012;43: S6–S18. doi:10.1638/2011-0152.1
- 432 35. Adams PC, Beaton MD. Transferrin saturation as a predictor of hepatic iron overload.  
433 *Liver Int Off J Int Assoc Study Liver.* 2011;31: 272–273. doi:10.1111/j.1478-  
434 3231.2010.02335.x

- 435 36. Mylniczenko ND, Sullivan KE, Corcoran ME, Fleming GJ, Valdes EV. Management  
436 strategies of iron accumulation in a captive population of black rhinoceroses (*Diceros*  
437 *bicornis minor*). *J Zoo Wildl Med.* 2012;43: S83–S91. doi:10.1638/2011-0168.1
- 438 37. Miller M, Chavey PS, Hofmeyr J, Mathebula N, Doering A, Buss P, et al. Evaluation of  
439 serum ferritin and serum iron in free-ranging black rhinoceros (*Diceros bicornis*) as a tool  
440 to understand factors affecting Iron Overload Disorder. *J Zoo Wildl Med.* 2016;47: 820–  
441 826. doi:10.1638/2015-0295.1
- 442 38. Kalantar-Zadeh K, Rodriguez RA, Humphreys MH. Association between serum ferritin  
443 and measures of inflammation, nutrition and iron in haemodialysis patients. *Nephrol Dial*  
444 *Transplant.* 2004;19: 141–149. doi:10.1093/ndt/gfg493
- 445 39. Roth TL, Reinhart PR, Kroll JL. Serum ferritin concentration is not a reliable biomarker  
446 of Iron Overload Disorder progression or hemochromatosis in the Sumatran rhinoceros  
447 (*Dicerorhinus sumatrensis*). *J Zoo Wildl Med.* 2017;48: 645–658. doi:10.1638/2017-  
448 0010.1
- 449 40. Siek G, Lawlor J, Pelczar D, Sane M, Musto J. Direct serum total iron-binding capacity  
450 assay suitable for automated analyzers. *Clin Chem.* 2002;48: 161–166.  
451 doi:10.1093/clinchem/48.1.161
- 452 41. Yamanishi H, Iyama S, Yamaguchi Y, Kanakura Y, Iwatani Y. Total iron-binding  
453 capacity calculated from serum transferrin concentration or serum iron concentration and  
454 unsaturated iron-binding capacity. *Clin Chem.* 2003;49: 175–178. doi:10.1373/49.1.175
- 455 42. Adams PC. Epidemiology and diagnostic testing for hemochromatosis and iron overload.  
456 *Int J Lab Hematol.* 2015;37: 25–30. doi:10.1111/ijlh.12347
- 457 43. Ambrojo KS, Poggi JCG, Juzado AM. Use of laboratory testing to diagnose liver and  
458 biliary dysfunction in the horse. *J Gastroenterol Hepatol Res.* 2013;2: 807–813.  
459 doi:10.6051/j.issn.2224-3992.2013.02.344
- 460 44. Theelen MJP, Beukers M, Grinwis GCM, Sloet van Oldruitenborgh-Oosterbaan MM.  
461 Hemochromatosis and liver failure in 11 horses due to chronic iron intoxication. *Proc 7th*  
462 *Congress of the European College of Equine Internal Medicine.* Prague, Czech Republic;  
463 2014. p. 15.
- 464 45. Olsman AFS, Sloet van Oldruitenborgh-Oosterbaan MM. Primary liver disease in the  
465 horse. *Tijdschr Diergeneeskd.* 2004; 510–522.
- 466 46. Nielsen BD, Vick MM, Dennis PM. A potential link between insulin resistance and Iron  
467 Overload Disorder in browsing rhinoceroses investigated through the use of an equine  
468 model. *J Zoo Wildl Med.* 2012;43: S61–S65. doi:10.1638/2011-0145.1
- 469 47. Clauss M, Castell JC, Kienzle E, Schramel P, Dierenfeld ES, Flach EJ, et al. Mineral  
470 absorption in the black rhinoceros (*Diceros bicornis*) as compared with the domestic  
471 horse. *J Anim Physiol Anim Nutr.* 2007;91: 193–204. doi:10.1111/j.1439-  
472 0396.2007.00692.x

- 473 48. Miller M. Effect of venipuncture site and anticoagulant on selected hematologic values in  
474 black rhinoceros (*Diceros bicornis*). J Zoo Wildl Med. 2003;34: 59–64.  
475 doi:10.1638/1042-7260(2003)34[0059:EOVSAA]2.0.CO;2
- 476 49. Aziza SAH, Azab ME-S, El-Shall SK. Ameliorating role of rutin on oxidative stress  
477 induced by iron overload in hepatic tissue of rats. Pak J Biol Sci PJBS. 2014;17: 964–977.  
478 doi:10.3923/pjbs.2014.964.977
- 479 50. Paglia DE. An historical perspective: Iron Overload Disease in browser rhinoceroses.  
480 Keeper workshop; 2015; Chester.
- 481 51. O’Connell T, Horita TJ, Kasravi B. Understanding and interpreting the serum protein  
482 electrophoresis. Am Fam Physician. 2005;71: 105–112.
- 483 52. Hübscher SG. Iron overload, inflammation and fibrosis in genetic haemochromatosis. J  
484 Hepatol. 2003;38: 521–525. doi:10.1016/s0168-8278(03)00078-3
- 485 53. Schook MW, Wildt DE, Raghanti MA, Wolfe BA, Dennis PM. Increased inflammation  
486 and decreased insulin sensitivity indicate metabolic disturbances in zoo-managed  
487 compared to free-ranging black rhinoceros (*Diceros bicornis*). Gen Comp Endocrinol.  
488 2015;217–218: 10–19. doi:10.1016/j.ygcen.2015.05.003
- 489 54. Sfar S, Boussoffara R, Sfar MT, Kerkeni A. Antioxidant enzymes activities in obese  
490 Tunisian children. Nutr J. 2013;12: 18. doi:10.1186/1475-2891-12-18
- 491 55. Reuter H, Adcock K. Standardised body condition scoring system for black rhinoceros  
492 (*Diceros bicornis*). Pachyderm. 1998;26: 116–121.
- 493 56. Heidegger EM, Houwald F von, Steck B, Clauss M. Body condition scoring system for  
494 greater one-horned rhino (*Rhinoceros unicornis*): Development and application. Zoo Biol.  
495 2016;35: 432–443. doi:10.1002/zoo.21307
- 496 57. Takada T, Kodera Y, Matsubara M, Kawashima Y, Maeda T, Fujita Y, et al. Serum  
497 monomeric  $\alpha$ 2-macroglobulin as a clinical biomarker in diabetes. Atherosclerosis.  
498 2013;228: 270–276. doi:10.1016/j.atherosclerosis.2013.02.035
- 499 58. Hammadah M, Fan Y, Wu Y, Hazen SL, Wilson Tang WH. Prognostic value of elevated  
500 serum ceruloplasmin levels in patients with heart failure. J Card Fail. 2014;20: 946–952.  
501 doi:10.1016/j.cardfail.2014.08.001
- 502 59. Yanoff L, Menzie C, Denkinger B, Sebring N, McHugh T, Remaley A, et al. Inflammation  
503 and iron deficiency in the hypoferremia of obesity. Int J Obes 2005. 2007;31: 1412–1419.  
504 doi:10.1038/sj.ijo.0803625
- 505 60. Paglia DE. Recommended phlebotomy guidelines for prevention and therapy of captivity-  
506 induced iron-storage disease in rhinoceroses, tapirs and other exotic wildlife. Proc AAZV.  
507 2004; 122–127.
- 508 61. Colombini F, Carratelli M, Alberti A. Oxidative stress, d-ROMs test, and ceruloplasmin.  
509 Free Radic Res. 2016;50: 447–453. doi:10.3109/10715762.2015.1136063

- 510 62. Ito F, Ito T, Suzuki C, Yahata T, Ikeda K, Hamaoka K. The application of a modified d-  
511 ROMs test for measurement of oxidative stress and oxidized high-density lipoprotein. *Int*  
512 *J Mol Sci.* 2017;18. doi:10.3390/ijms18020454
- 513 63. Bayraktar N, Kilic S, Bayraktar MR, Aksoy N. Lipid peroxidation and antioxidant enzyme  
514 activities in cancerous bladder tissue and their relation with bacterial infection: a  
515 controlled clinical study. *J Clin Lab Anal.* 2010;24: 25–30. doi:10.1002/jcla.20356
- 516 64. Lucas ML, Carraro CC, Belló-Klein A, Kalil AN, Aerts N. Oxidative stress in human aorta  
517 of patients with advanced aortoiliac occlusive disease. *Braz J Cardiovasc Surg.* 2016;31:  
518 428–433. doi:10.5935/1678-9741.20160086
- 519 65. Cheng C-F, Lian W-S. Prooxidant mechanisms in iron overload cardiomyopathy. *BioMed*  
520 *Res Int.* 2013;2013: 1–8. doi:10.1155/2013/740573
- 521 66. Kachhawa K, Kachhawa P, Varma M, Behera R, Agrawal D, Kumar S. Study of the  
522 stability of various biochemical analytes in samples stored at different predefined storage  
523 conditions at an accredited laboratory of India. *J Lab Physicians.* 2017;9: 11–15.  
524 doi:10.4103/0974-2727.187928
- 525

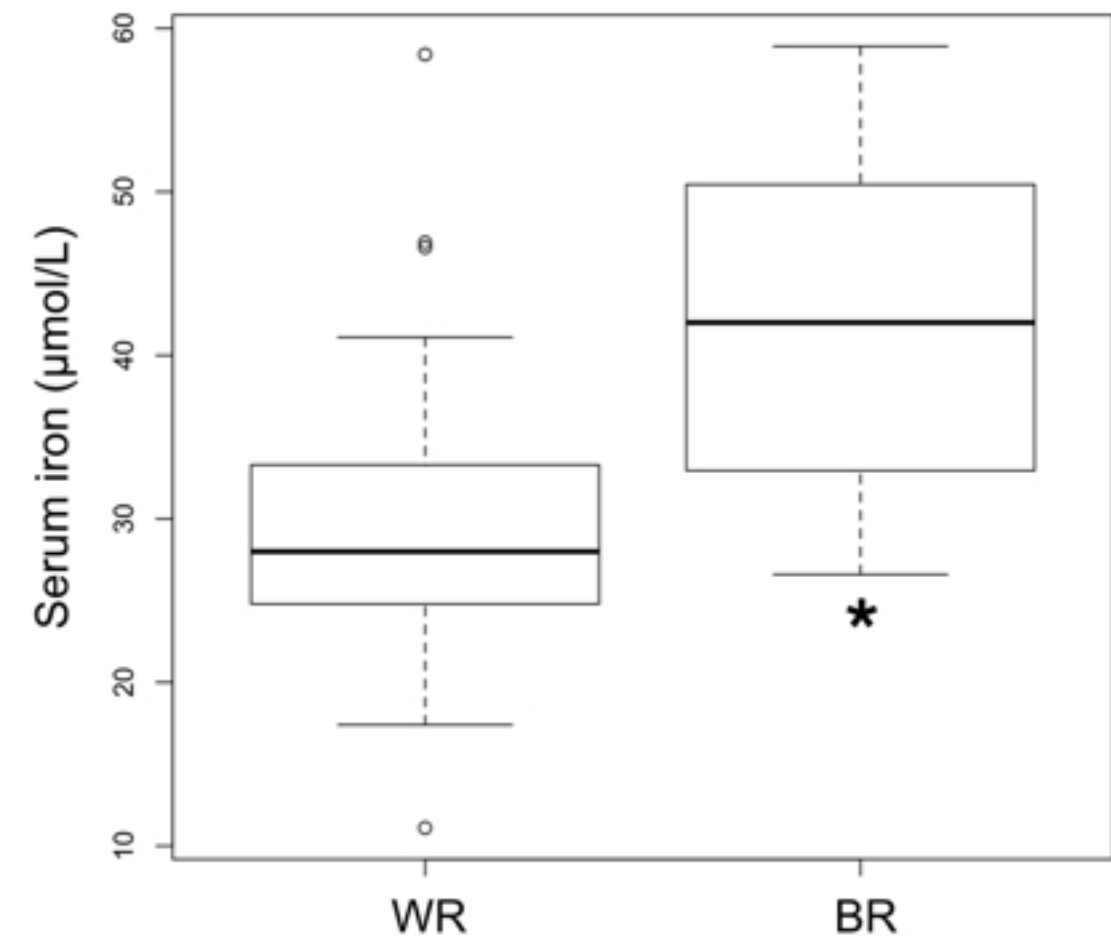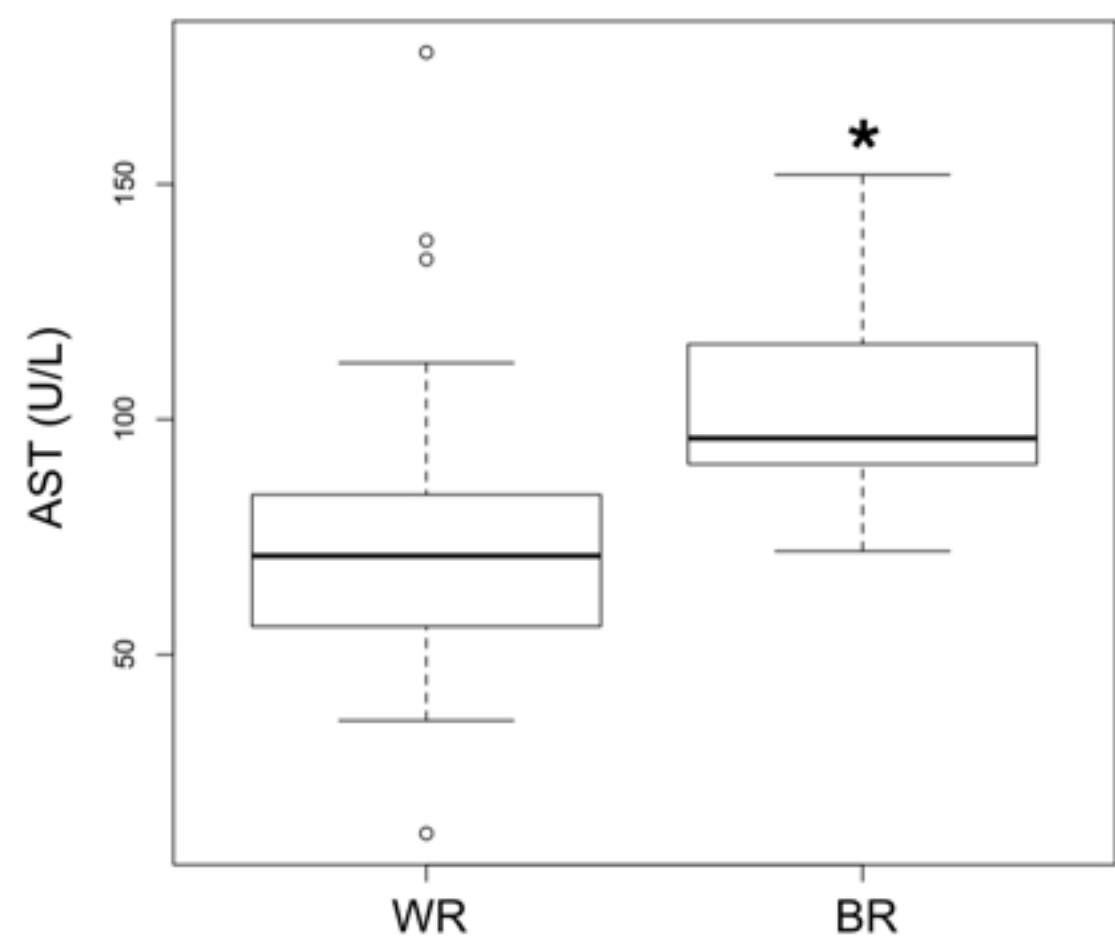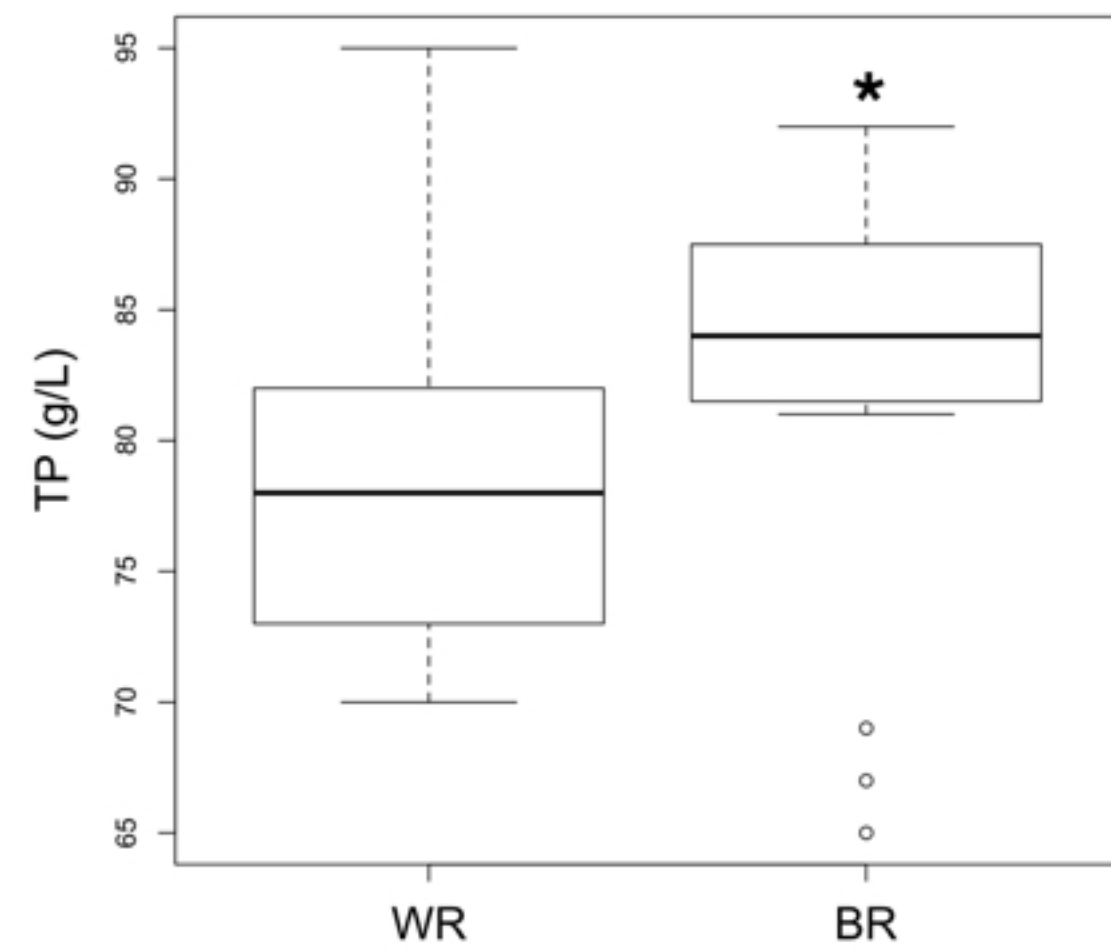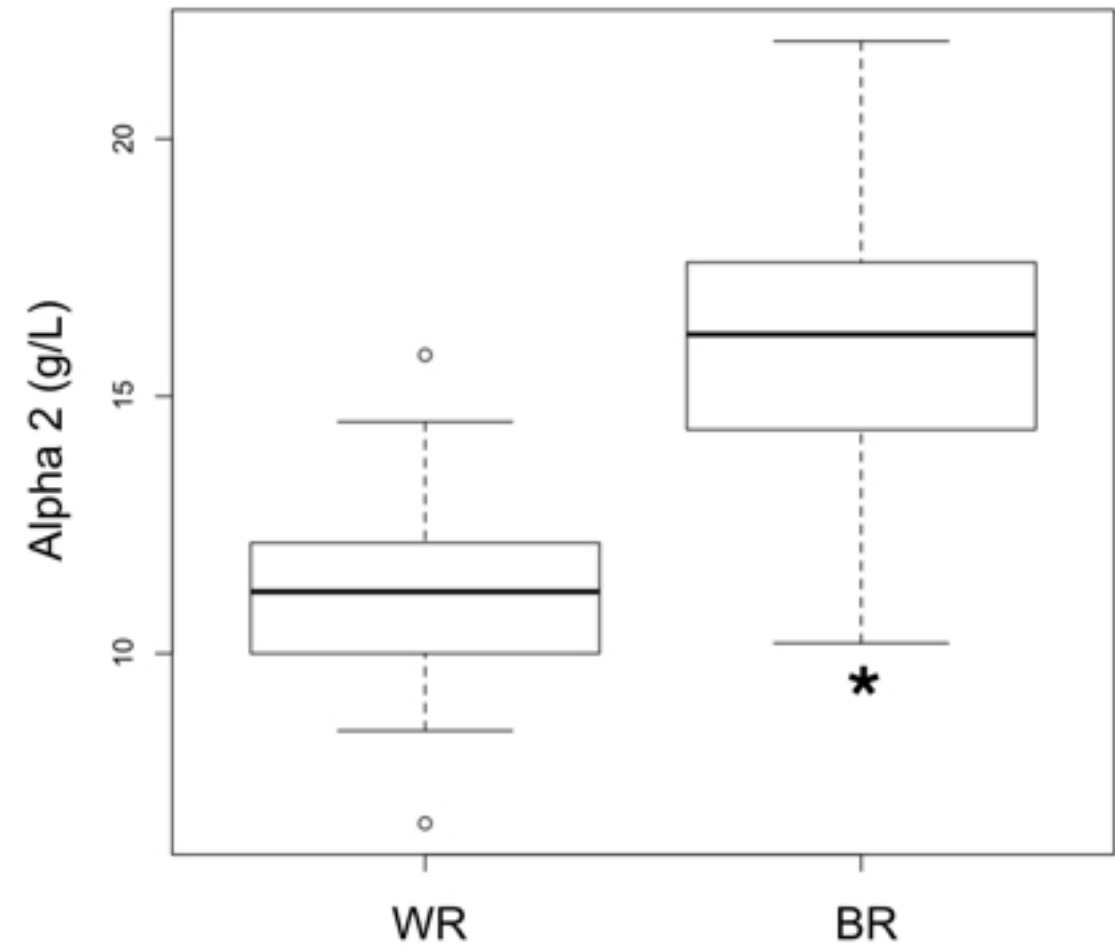

Fig1

**WR**

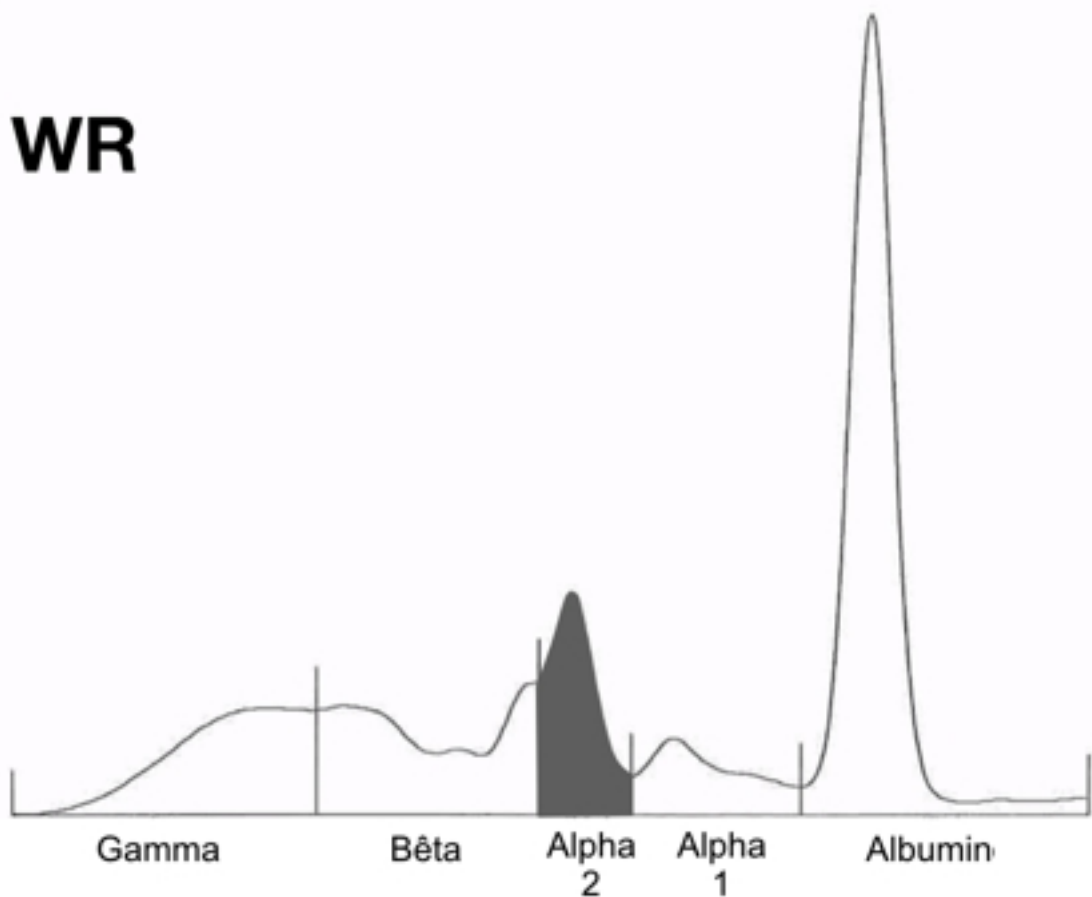

**BR**

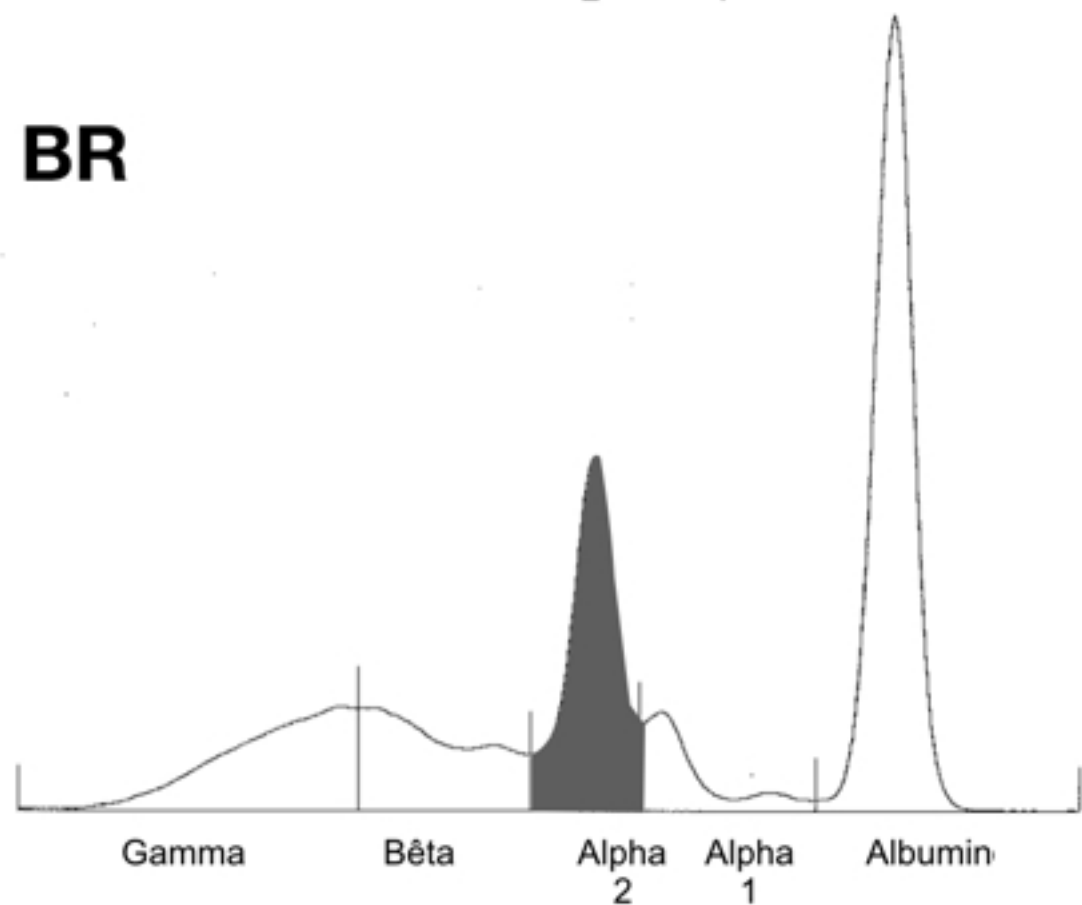

**Fig2**
